# Supplementary material for: Evolutionary Analysis of Grapevine Virus A: Insights into the Dispersion in Sicily (Italy)
Source: MDPI journal article supplement (doi:10.3390/agriculture12060835), 2022-06-09
Supplement: s1 [file s1]

Table S2. Nucleotide diversity<sup>a</sup> of Grapevine virus A (GVA) in different geographical populations.

|                | n <sup>b</sup> | Japan       | Czech Republic | Italy               | Greece              | Australia           | France        | China               | Macedonia     | South Africa         | Croatia       | Brazil              | Iran                | Israel        | Poland              | Canada        | USA           |
|----------------|----------------|-------------|----------------|---------------------|---------------------|---------------------|---------------|---------------------|---------------|----------------------|---------------|---------------------|---------------------|---------------|---------------------|---------------|---------------|
| Japan          | 1              | <b>n.c.</b> | 0.0629±0.0000  | 0.1598±0.0346       | 0.1487±0.0752       | 0.1674±0.0848       | 0.1335±0.0000 | 0.1833±0.1034       | 0.1315±0.0000 | 0.1854±0.0913        | 0.1456±0.0000 | 0.1430±0.0683       | 0.1568±0.0784       | 0.1537±0.0000 | 0.1589±0.0796       | 0.2763±0.0000 | 0.3010±0.0000 |
| Czech Republic | 1              |             | <b>n.c.</b>    | 0.1517±0.0327       | 0.1436±0.0723       | 0.1590±0.0803       | 0.1395±0.0000 | 0.1890±0.1027       | 0.1216±0.0000 | 0.1804±0.0889        | 0.1435±0.0000 | 0.1397±0.0673       | 0.1548±0.0774       | 0.1476±0.0000 | 0.1507±0.0756       | 0.2763±0.0000 | 0.3085±0.0000 |
| Italy          | 21             |             |                | <b>0.0681±0.015</b> | 0.1679±0.0315       | 0.1549±0.0290       | 0.1442±0.0310 | 0.1847±0.0515       | 0.1242±0.0266 | 0.1691±0.0441        | 0.1196±0.0256 | 0.1362±0.0259       | 0.1435±0.0270       | 0.1616±0.0347 | 0.1650±0.0323       | 0.2665±0.0568 | 0.2741±0.0584 |
| Greece         | 2              |             |                |                     | <b>0.1896±0.500</b> | 0.1659±0.0842       | 0.1622±0.0823 | 0.1883±0.0923       | 0.1445±0.0724 | 0.1780±0.0780        | 0.1386±0.0705 | 0.1456±0.0645       | 0.1502±0.0755       | 0.1369±0.0718 | 0.1401±0.0753       | 0.2525±0.1265 | 0.2691±0.1345 |
| Australia      | 2              |             |                |                     |                     | <b>0.1971±0.500</b> | 0.1152±0.0784 | 0.1872±0.0947       | 0.1247±0.0640 | 0.1700±0.0775        | 0.1304±0.0652 | 0.1425±0.0648       | 0.1467±0.0744       | 0.1537±0.0770 | 0.1646±0.0824       | 0.2514±0.1260 | 0.2779±0.1403 |
| France         | 1              |             |                |                     |                     |                     | <b>n.c.</b>   | 0.1867±0.1099       | 0.1215±0.0000 | 0.1810±0.0913        | 0.1255±0.0000 | 0.1298±0.0632       | 0.1324±0.0662       | 0.1517±0.0000 | 0.1683±0.0846       | 0.2836±0.0000 | 0.3085±0.0000 |
| China          | 3              |             |                |                     |                     |                     |               | <b>0.2277±0.272</b> | 0.1595±0.0905 | 0.1797±0.0735        | 0.1571±0.0977 | 0.1617±0.0783       | 0.1770±0.0930       | 0.1887±0.0981 | 0.1954±0.0946       | 0.2112±0.1182 | 0.2200±0.1108 |
| Macedonia      | 1              |             |                |                     |                     |                     |               |                     | <b>n.c.</b>   | 0.1442±0.0755        | 0.1098±0.0000 | 0.1097±0.0557       | 0.1176±0.0589       | 0.1476±0.0000 | 0.1537±0.0769       | 0.2478±0.0000 | 0.2739±0.0000 |
| South Africa   | 4              |             |                |                     |                     |                     |               |                     |               | <b>0.1978±0.1770</b> | 0.1521±0.0797 | 0.1482±0.0657       | 0.1581±0.0764       | 0.1725±0.0837 | 0.1753±0.0791       | 0.2126±0.1064 | 0.2368±0.1060 |
| Croatia        | 1              |             |                |                     |                     |                     |               |                     |               |                      | <b>n.c.</b>   | 0.1017±0.0505       | 0.1176±0.0000       | 0.1375±0.0000 | 0.1405±0.0707       | 0.2501±0.0000 | 0.2596±0.0000 |
| Brazil         | 3              |             |                |                     |                     |                     |               |                     |               |                      |               | <b>0.1050±0.272</b> | 0.1047±0.0537       | 0.1382±0.0653 | 0.1422±0.0630       | 0.2466±0.1175 | 0.2464±0.1166 |
| Iran           | 2              |             |                |                     |                     |                     |               |                     |               |                      |               |                     | <b>0.0502±0.500</b> | 0.1466±0.0733 | 0.1527±0.0766       | 0.2643±0.1323 | 0.2727±0.1365 |
| Israel         | 1              |             |                |                     |                     |                     |               |                     |               |                      |               |                     |                     | <b>n.c.</b>   | 0.0601±0.0305       | 0.2455±0.0000 | 0.2596±0.0000 |
| Poland         | 2              |             |                |                     |                     |                     |               |                     |               |                      |               |                     |                     |               | <b>0.0628±0.500</b> | 0.2655±0.1328 | 0.2572±0.1286 |
| Canada         | 1              |             |                |                     |                     |                     |               |                     |               |                      |               |                     |                     |               |                     | <b>n.c.</b>   | 0.1579±0.0000 |
| USA            | 1              |             |                |                     |                     |                     |               |                     |               |                      |               |                     |                     |               |                     |               | <b>n.c.</b>   |

Nucleotide diversity within a group is reported in bold in the diagonal, while nucleotide diversity between groups are reported above the diagonal.

<sup>a</sup>Nucleotide diversity was measured by the Jukes–Cantor method.

<sup>b</sup>Number of isolates for each population; n.c., not calculated.
