# Supplementary material for: Evolutionary Analysis of Grapevine Virus A: Insights into the Dispersion in Sicily (Italy)
Source: MDPI journal article supplement (doi:10.3390/agriculture12060835), 2022-06-09
Supplement: s1 [file s1]

**Table S1.** Optical density (OD<sub>405</sub>) values of DAS-ELISA positive samples.

| <b>Cultivar</b>      | <b>ID Sample</b> | <b>OD<sub>405</sub> value</b> |
|----------------------|------------------|-------------------------------|
| Grillo               | GLL 1            | 1.647                         |
|                      | GLL 2            | 1.548                         |
|                      | GLL 37           | 1.778                         |
|                      | GLL 59           | 1.625                         |
|                      | GLL 93           | 1.998                         |
| Nerello Mascalese    | NMA 1            | 1.801                         |
|                      | NMA 2            | 1.654                         |
|                      | NMA 3            | 1.688                         |
|                      | NMA 4            | 1.758                         |
|                      | NMA 7            | 1.856                         |
|                      | NMA 12           | 1.420                         |
|                      | NMA 13           | 1.305                         |
|                      | NMA 23           | 1.365                         |
|                      | NMA 26           | 1.299                         |
|                      | NMA 29           | 1.985                         |
|                      | NMA 31           | 1.054                         |
|                      | NMA 32           | 1.965                         |
|                      | NMA 35           | 1.991                         |
|                      | NMA 36           | 1.347                         |
|                      | NMA 37           | 1.258                         |
|                      | NMA 39           | 1.259                         |
|                      | NMA 40           | 1.123                         |
|                      | NMA 41           | 1.324                         |
| Zibibbo              | ZIB 1            | 1.903                         |
| Nero d'Avola         | NAV 1            | 1.897                         |
|                      | NAV 15           | 1.532                         |
|                      | NAV 32           | 1.437                         |
|                      | NAV 33           | 1.254                         |
| Carricante           | CRR 1            | 1.967                         |
|                      | CRR 2            | 1.774                         |
|                      | CRR 17           | 1.665                         |
|                      | CRR 20           | 1.524                         |
|                      | CRR 24           | 1.992                         |
|                      | CRR 25           | 1.887                         |
| Nerello Cappuccio    | NCA 1            | 1.634                         |
| Grecanico            | GRE 1            | 1.758                         |
|                      | GRE 37           | 1.369                         |
|                      | GRE 55           | 1.149                         |
| Perricone            | PER 1            | 1.794                         |
|                      | PER 2            | 1.800                         |
|                      | PER 19           | 1.887                         |
|                      | PER 27           | 1.901                         |
|                      | PER 53           | 1.767                         |
|                      | PER 55           | 1.298                         |
|                      | PER 73           | 1.953                         |
| Catarratto           | CAT 1            | 1.410                         |
|                      | CAT 45           | 1.552                         |
|                      | CAT 58           | 1.736                         |
| Alicante             | ALI 1            | 1.603                         |
| GVA Positive control | POS              | 1.648                         |
| GVA Negative control | NEG              | 0.083                         |
| Blank                | BLK              | 0.000                         |
